# Supplementary material
Source: PubMed Central journal article supplement (PMC4437517)
Supplement: NIHMS689820-supplement-Supplemental_file.pdf [file NIHMS689820-supplement-Supplemental_file.pdf]

## SUPPLEMENTARY MATERIALS

**Table 1. Phosphatase Model Substrates Screen**

|            |          |                    |                        |                        |
|------------|----------|--------------------|------------------------|------------------------|
| 1. 5'-AMP  | 16. CDP  | 31. Pyrophosphate  | 46. Fructose-1,6-bisP  | 61. inositol hexakis-P |
| 2. 5'-CMP  | 17. GDP  | 32. NADP           | 47. Erythrose-4P       | 62. 2-deoxy-glucose-6P |
| 3. 5'-GMP  | 18. IDP  | 33. FMN            | 48. Trehalose- 6P      | 63. 2-deoxy-ribose-5P  |
| 4. 5'-IMP  | 19. TDP  | 34. P-Enolpyruvate | 49. Thiamine-P         | 64. Polyphosphate      |
| 5. 5'-TMP  | 20. UDP  | 35. CoA            | 50. Thiamine-PP        | 65. 5-P-ribosyl-1Ppi   |
| 6. 5'-UMP  | 21. ATP  | 36. P-Choline      | 51. Glucose-1,6-bisP   | 66. 2P-Glycerate       |
| 7. 2'-AMP  | 22. CTP  | 37. Glucose-1P     | 52. P-Serine           | 67. 3P-Glycerate       |
| 8. 2'-CMP  | 23. GTP  | 38. Glucose-6P     | 53. P-Threonine        | 68. Dihydroxyacetone-P |
| 9. 3'-AMP  | 24. ITP  | 39. Fructose-1P    | 54. P-Tyrosine         | 69. 3P-Glyeraldehyde   |
| 10. 3'-CMP | 25. TTP  | 40. Fructose-6P    | 55. P-Arginine         | 70. Pyridoxal-P        |
| 11. dAMP   | 26. UTP  | 41. Ribose-5P      | 56. P-Glycolate        | 71. Sucrose-6P         |
| 12. dCMP   | 27. dATP | 42. Imido-diP      | 57. $\beta$ -Glycero-P | 72. Phosphonoacetate   |
| 13. dGMP   | 28. dCTP | 43. Mannose-1P     | 58. P-Ascorbate        | 73. PI(5)P             |
| 14. dTMP   | 29. dGTP | 44. Mannose-6P     | 59. Glucoseamine-6P    | 74. PI(3)P             |
| 15. ADP    | 30. dTTP | 45. Galactose-1P   | 60. 6P-Gluconate       |                        |

Abbreviations: 5'-AMP, adenosine 5'-monophosphate; 5'-CMP, cytidine 5'-monophosphate; 5'-GMP, guanosine 5'-monophosphate; 5'-IMP, inosine 5'-monophosphate; 5'-TMP, thymidine 5'-monophosphate; 5'-UMP, uridine 5'-monophosphate; 2'-AMP, adenosine 2'-monophosphate; 2'-CMP, cytidine 2'-monophosphate; 3'-AMP, adenosine 3'-monophosphate; 3'-CMP, cytidine 3'-monophosphate; dAMP, 2'-deoxyadenosine monophosphate; dCMP, 2'-deoxycytidine monophosphate; dGMP, 2'-deoxyguanosine monophosphate; dTMP, 2'-deoxythymidine monophosphate; ADP, adenosine 5'-diphosphate; CDP, cytidine 5'-diphosphate; IDP, inosine 5'-diphosphate; TDP, thymidine 5'-diphosphate; UDP, uridine 5'-diphosphate; ATP, adenosine 5'-triphosphate; CTP, cytidine 5'-triphosphate; GTP, guanosine 5'-triphosphate; ITP, inosine 5'-triphosphate; TTP, thymidine 5'-triphosphate; UTP, uridine 5'-triphosphate; dATP, 2'-deoxyadenosine 5'-triphosphate; dCTP, 2'-deoxycytidine 5'-triphosphate; dGTP, 2'-deoxyguanosine 5'-triphosphate; dTTP, 2'-deoxythymidine 5'-triphosphate; NADP, nicotinamide adenine dinucleotide phosphate; FMN, flavin mononucleotide; CoA, Coenzyme A; PI(5)P, L-alpha-phosphotidyl-D-myo-inositol 5-monophosphate; PI(3)P, L-alpha-phosphotidyl-D-myo-inositol 3-monophosphate.
